# Supplementary material for: A Novel Ultrasound-Assisted Extraction Method for the Analysis of Anthocyanins in Potatoes (Solanum tuberosum L.)
Source: MDPI journal article supplement (doi:10.3390/antiox10091375), 2021-08-28
Supplement: s1 [file s1]

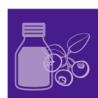

## Article

# A Novel Ultrasound-Assisted Extraction Method for the Analysis of Anthocyanins in Potatoes (*Solanum tuberosum* L.)

## Supplementary Material

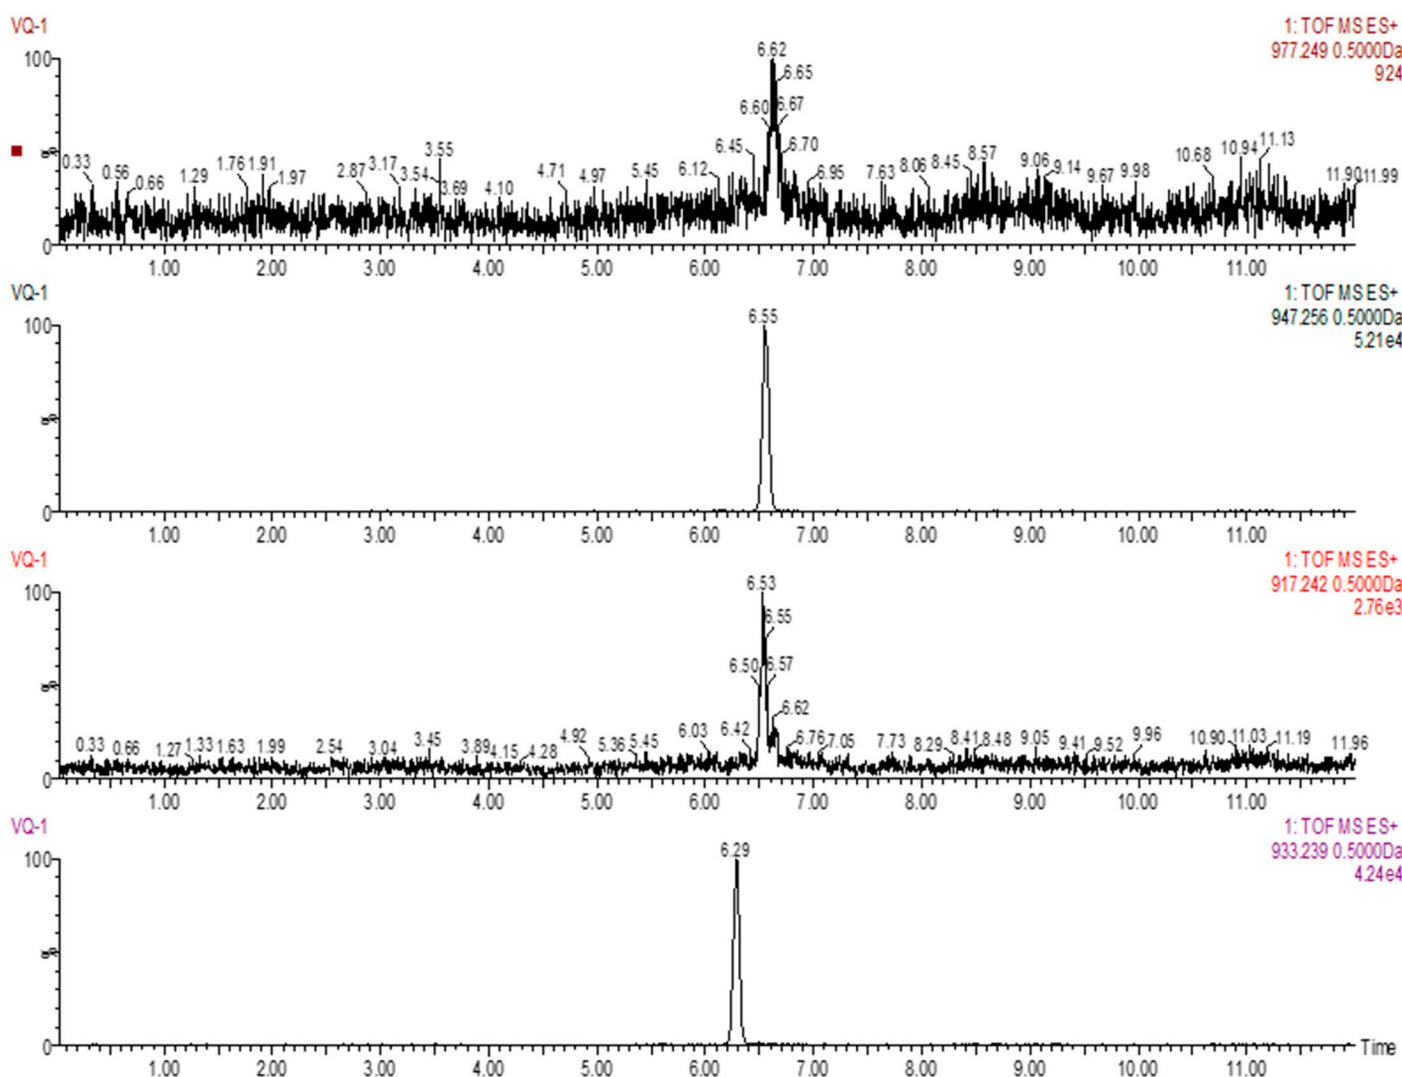

**Figure S1.** Chromatograms obtained for the potato variety Violet Queen by UHPLC-PDA-QToF-MS. The  $m/z$  identified were  $m/z$  933.2390 (Time 6.29 min: Compound 2. Petunidin 3-*p*-coumaroylrutinoside-5-glucoside),  $m/z$  917.2419 (Time 6.53 min: Compound 4. Peonidin 3-*p*-coumaroylrutinoside-5-glucoside),  $m/z$  947.2563 (Time 6.55 min: Compound 5. Malvidin 3-*p*-coumaroylrutinoside-5-glucoside), and  $m/z$  977.2499 (Time 6.62 min: Compound 7. Malvidin 3-feruoylrutinoside-5-glucoside).

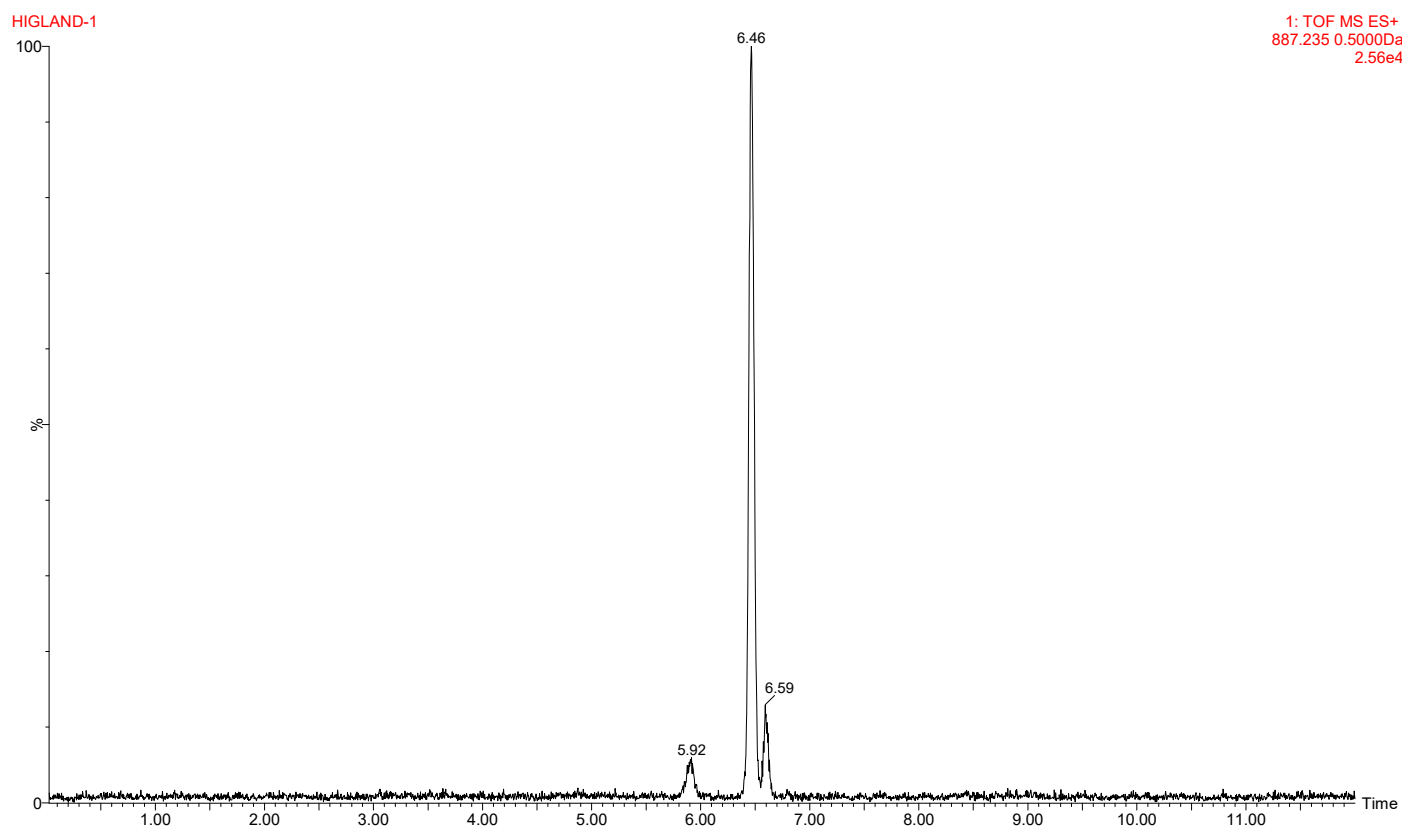

**Figure S2.** Chromatogram obtained for the potato variety Highland by UHPLC-PDA-QToF-MS. The  $m/z$  identified was  $m/z$  887.2387, corresponding with (Time 5.92 min: Compound 1. Pelargonidin 3-*p*-coumaroylrutinoside-5-glucoside; Time 6.46 min: Compound 3. Pelargonidin 3-*p*-coumaroylrutinoside-5-glucoside; Time 6.59 min: Compound 6. Pelargonidin derivative).

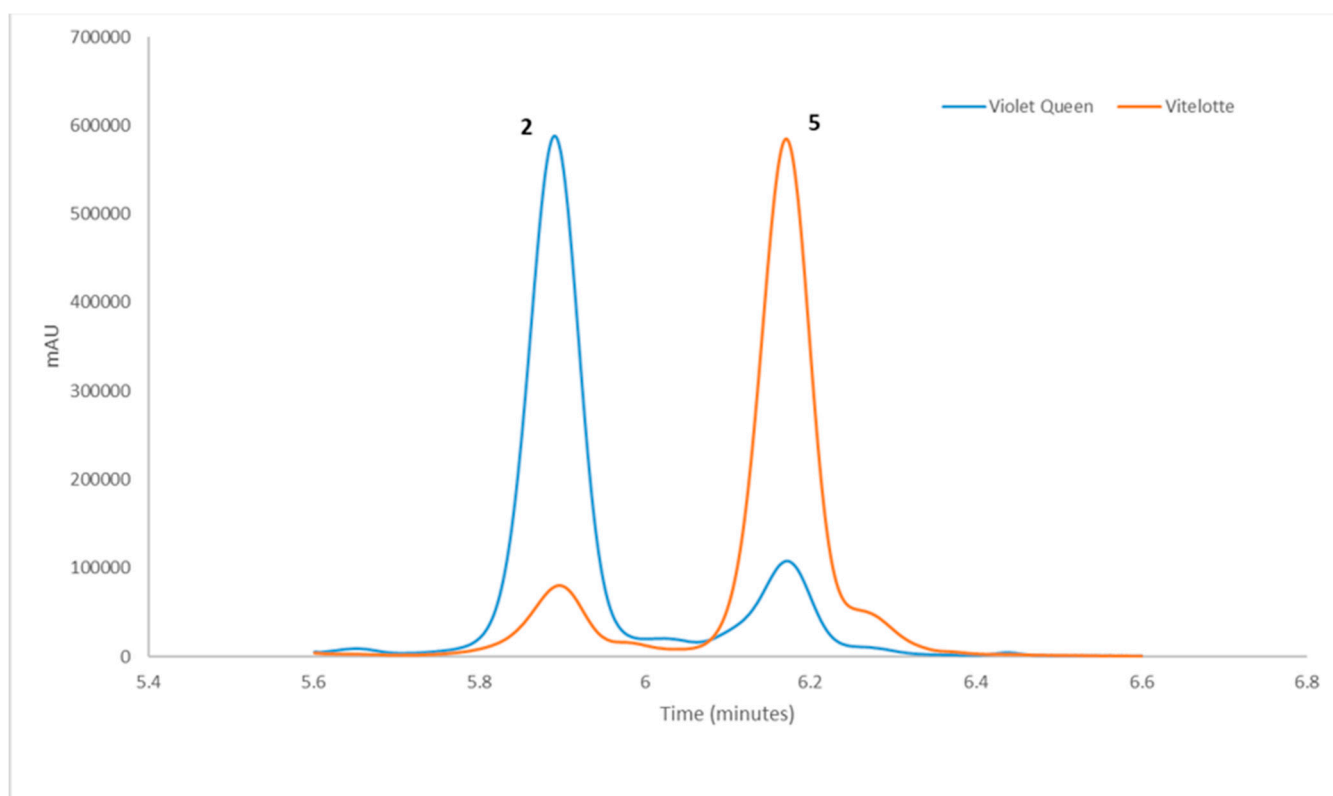

**Figure S3.** Overlay of the UHPLC chromatogram of the major anthocyanins in purple-fleshed Vitelotte (blue) and Violet Queen (red) potato varieties at 520 nm. **2:** Petunidin 3-*p*-coumaroylrutinoside-5-glucoside; **5:** Malvidin 3-*p*-coumaroylrutinoside-5-glucoside.
